# Supplementary material
Source: Royal Society of Chemistry journal article supplement (doi:10.1039/d5ay01872b)
Supplement: d5ay01872b1.pdf [file d5ay01872b1.pdf]

## Supplementary Information

Manuscript ref. No: **AY-ART-11-2025-001872.R1**

Manuscript title - "High-Performance Nanohybrid Impedimetric Platform for Early Cancer Detection via c-Myc Oncoprotein Sensing."

Diptirekha Mohanta and Urmila Saxena\*

Department of Biotechnology, National Institute of Technology Warangal, Warangal 506004,  
Telangana, India

**\*Corresponding author:**

Dr Urmila Saxena

Associate Professor,

Department of Biotechnology, National Institute of Technology Warangal, India

E-mail addresses: [urmila@nitw.ac.in](mailto:urmila@nitw.ac.in),

Phone: 8332969442

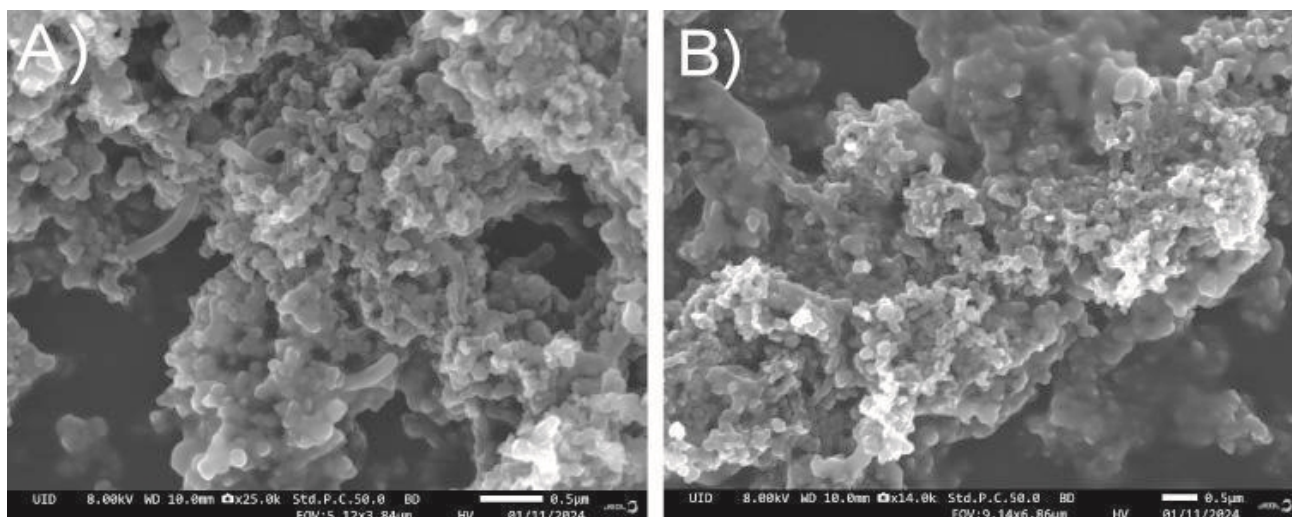

Figure S1. SEM images of **A)** MWCNTs decorated over the GCE/Nf electrode. **B)** AgNPs are decorated over the GCE/Nf/MWCNTs electrode.

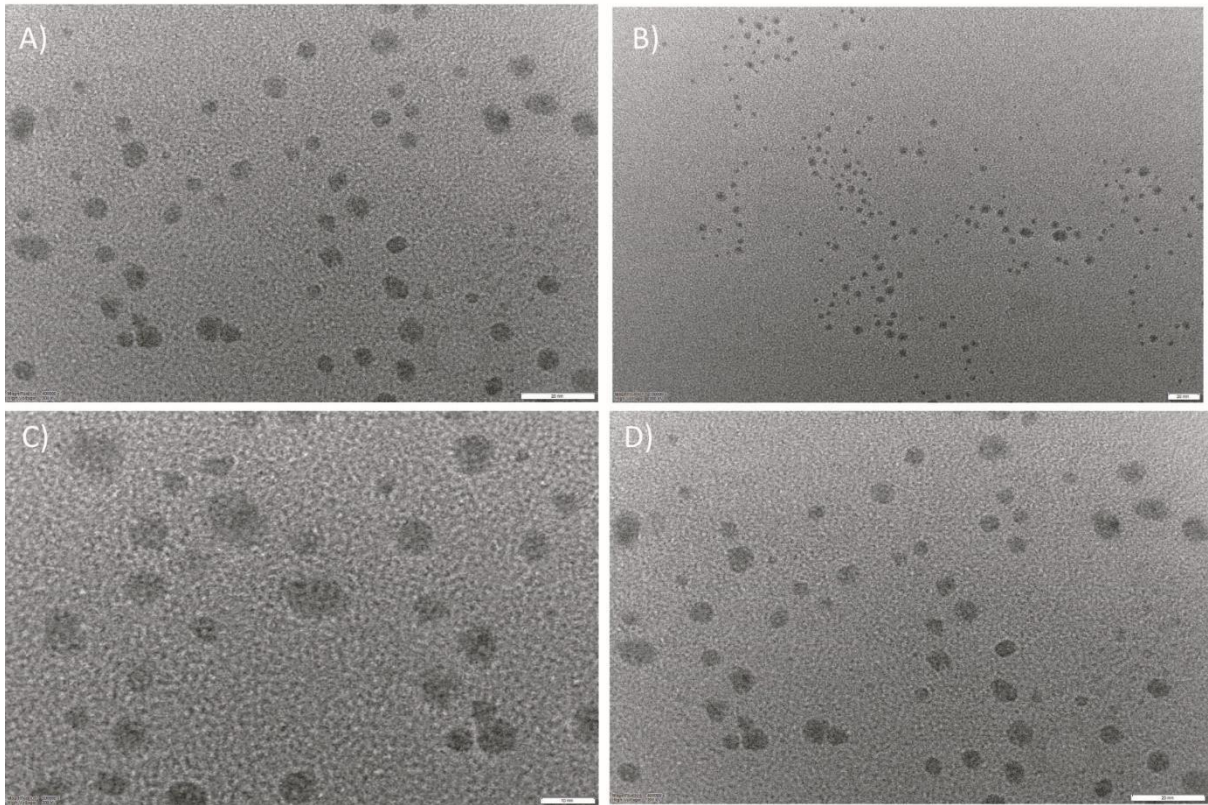

Figure S2. TEM images of silver nanoparticles at different magnifications.

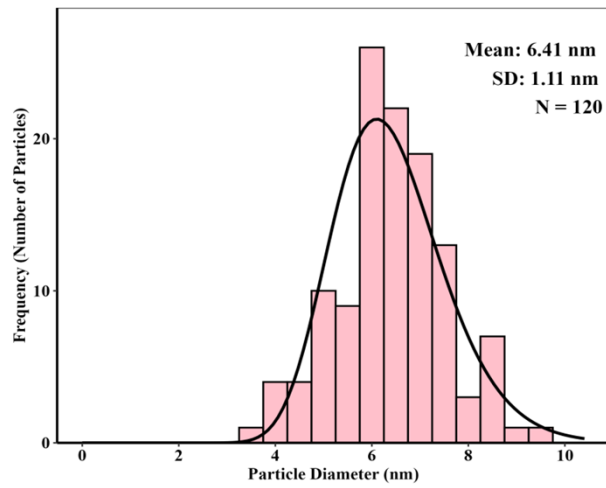

Figure S3. Particle size histogram of synthesized silver nanoparticles.

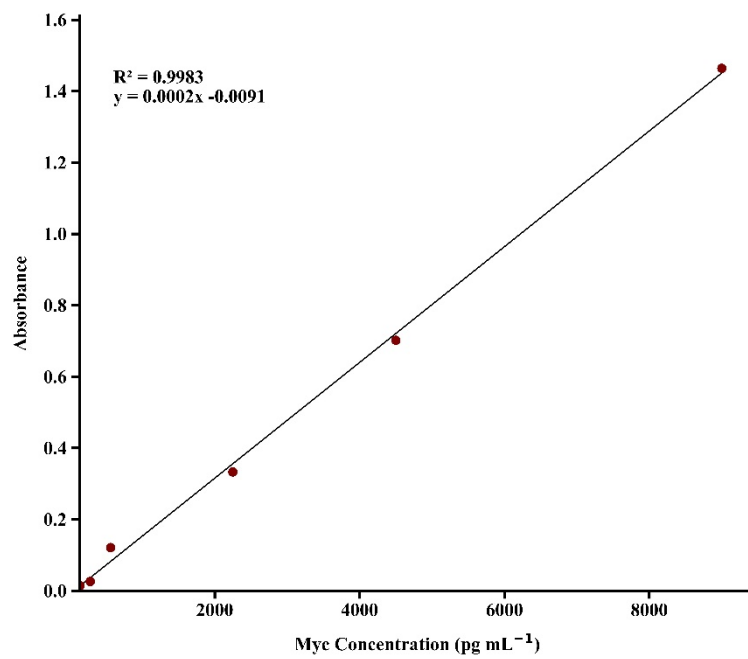

Figure S4. Sandwich ELISA calibration plot
